# Supplementary material for: Mesohepatectomy Versus Extended Hemihepatectomies for Centrally Located Liver Tumors: A Meta-Analysis
Source: PubMed Central journal article supplement (PMC5571172; doi:10.1038/s41598-017-09535-0), 2017-08-24
Supplement: 41598_2017_9535_MOESM1_ESM.pdf [file 41598_2017_9535_MOESM1_ESM.pdf]

# Mesohepatectomy Versus Extended Hemihepatectomies for

## Centrally Located Liver Tumors: A Meta-Analysis

Running title: Mesohepatectomy for Centrally Located Liver Tumors

Jianbo Li<sup>1,&</sup>, Chengdi Wang<sup>2,&</sup>, Jiulin Song<sup>1</sup>, Nan Chen<sup>3</sup>, Li Jiang<sup>1</sup>, Jiayin Yang<sup>1\*</sup>, Lunan Yan<sup>1\*</sup>

<sup>1</sup> Department of Liver Surgery and State Key Laboratory of Biotherapy, West China Hospital of Sichuan University, Chengdu, China

<sup>2</sup> Department of Respiratory and Critical Care Medicine, West China Medical School/West China Hospital, Sichuan University, Chengdu, China

<sup>3</sup> West China School of Medicine/West China Hospital, Sichuan University, Chengdu, China

\*To whom correspondence should be addressed:

Prof. Lunan Yan

Department of Liver Surgery & State Key Laboratory of Biotherapy, West China Hospital of Sichuan University, Chengdu 610041, P.R. China. Tel: +86-28-85422867, Fax: +86-28-85422867,

E-mail Address: yanlunan8060@163.com

Prof. Jiayin Yang

Department of Liver Surgery, West China Hospital, Sichuan University, Chengdu, 610041, P.R. China. Tel: +86-18980602047, Email address: doctoryjy@scu.edu.cn

& These authors contributed equally to this work.

**Supported by** a grant from the National Science and Technology Major Project of China (Grant number 81470037 to Prof. Jiayin Yang)



|                                  |    |    |           |           |                    |      |      |      |       |    |           |      |      |      |
|----------------------------------|----|----|-----------|-----------|--------------------|------|------|------|-------|----|-----------|------|------|------|
| Chen, 2006 <sup>12</sup>         | MH | NA | 100       | 8.6       | 98.3               | 17.1 | 42.0 | ALT  | 178.5 | NA | A: 90.9   | 1135 | 82.8 | 10.4 |
|                                  |    |    | (58/58)   | (5/58)    | (57/58, HBV 51)    |      |      | 40.5 |       |    | (50/55)   |      |      |      |
| Chen, 2006 <sup>12</sup>         | MH | NA | 100       | 6.6       | 96.7               | 17.1 | 41.0 | AST  | 188.3 | NA | A: 95.0   | 1300 | 80.0 | 11.5 |
|                                  |    |    | (60/60)   | (4/60)    | (58/60, HBV 54)    |      |      | 22.5 |       |    | (5/55)    |      |      |      |
| Arkadopoulos, 2012 <sup>17</sup> | MH | NA | NA        | NA        | NA                 | NA   | NA   | ALT  | NA    | NA | A: 100    | NA   | NA   | NA   |
|                                  |    |    | NA        | NA        | NA                 |      |      | 40.5 |       |    | (3/60)    |      |      |      |
| Chen, 2008 <sup>13</sup>         | MH | NA | 84.0      | 23.0      | 14.1               | NA   | NA   | ALT  | NA    | NA | A: 93.0   | 4200 | 84.4 | 7.2  |
|                                  |    |    | (215/256) | (59/256)  | (36/256, HBV 36)   |      |      | 40.5 |       |    | (238/256) |      |      |      |
| Chen, 2007 <sup>10</sup>         | MH | NA | 44.9      | 83.1      | 84.3               | 12.1 | 38.0 | ALT  | NA    | NA | A: 87.6   | 2838 | 86.5 | 60.7 |
|                                  |    |    | (40/89)   | (74/89)   | (75/89, HBV 75)    |      |      | 40.5 |       |    | (78/89)   |      |      |      |
| Chen, 2007 <sup>10</sup>         | MH | NA | 42.7      | 84.1      | 83.4               | 11.8 | 39.0 | ALT  | NA    | NA | A: 90.4   | 2335 | 83.4 | 56.1 |
|                                  |    |    | (67/157)  | (132/157) | (131/157, HBV 131) |      |      | 40.5 |       |    | (142/157) |      |      |      |
|                                  |    |    |           |           |                    |      |      | AST  |       |    | B: 9.1    |      |      |      |
|                                  |    |    |           |           |                    |      |      | ALT  |       |    | A: 95.0   |      |      |      |
|                                  |    |    |           |           |                    |      |      | AST  |       |    | B: 5.0    |      |      |      |
|                                  |    |    |           |           |                    |      |      | ALT  |       |    | A: 100    |      |      |      |
|                                  |    |    |           |           |                    |      |      | AST  |       |    | (16/16)   |      |      |      |
|                                  |    |    |           |           |                    |      |      | ALT  |       |    | A: 100    |      |      |      |
|                                  |    |    |           |           |                    |      |      | AST  |       |    | (20/20)   |      |      |      |
|                                  |    |    |           |           |                    |      |      | ALT  |       |    | A: 93.0   |      |      |      |
|                                  |    |    |           |           |                    |      |      | AST  |       |    | (238/256) |      |      |      |
|                                  |    |    |           |           |                    |      |      | ALT  |       |    | B: 7.0    |      |      |      |
|                                  |    |    |           |           |                    |      |      | AST  |       |    | (18/256)  |      |      |      |
|                                  |    |    |           |           |                    |      |      | ALT  |       |    | A: 87.6   |      |      |      |
|                                  |    |    |           |           |                    |      |      | AST  |       |    | (78/89)   |      |      |      |
|                                  |    |    |           |           |                    |      |      | ALT  |       |    | B: 12.4   |      |      |      |
|                                  |    |    |           |           |                    |      |      | AST  |       |    | (11/89)   |      |      |      |
|                                  |    |    |           |           |                    |      |      | ALT  |       |    | A: 90.4   |      |      |      |
|                                  |    |    |           |           |                    |      |      | AST  |       |    | (142/157) |      |      |      |
|                                  |    |    |           |           |                    |      |      | ALT  |       |    | B: 9.6    |      |      |      |
|                                  |    |    |           |           |                    |      |      | AST  |       |    | (15/157)  |      |      |      |



|                         |    |                  |                   |                 |                                         |      |      |             |       |      |                                             |     |    |                   |                  |                 |
|-------------------------|----|------------------|-------------------|-----------------|-----------------------------------------|------|------|-------------|-------|------|---------------------------------------------|-----|----|-------------------|------------------|-----------------|
| Qiu, 2013 <sup>1</sup>  | MH | NA               | 72.3<br>(211/292) | NA              | 73.3<br>(217/292,<br>HBV 214<br>HCV 3)  | 14.2 | 42.9 | ALT<br>51.1 | 146.5 | 11.5 | A: 94.5<br>(276/292)<br>B: 5.5<br>(16/292)  | 6.4 | NA | 82.2<br>(240/292) | NA               | 6.9<br>NA       |
|                         | EH | NA               | 61.6<br>(85/138)  | NA              | 68.8<br>(95/138,<br>HBV 95)             | 15.5 | 40.8 | ALT<br>45.7 | 155.5 | 11.4 | A: 90.6<br>(125/138)<br>B: 9.4<br>(13/138)  | 6.2 | NA | 76.1<br>(105/138) | NA               | 7.2             |
| Chen, 2014 <sup>6</sup> | MH | 25.4<br>(30/118) | 89.8<br>(106/118) | 8.5<br>(10/118) | 97.5<br>(115/118,<br>HBV 100<br>HCV 15) | NA   | NA   | NA          | NA    | NA   | A: 100<br>(118/118)                         | 5.3 | NA | NA                | NA               | 8.6<br>2.5-13.6 |
|                         | EH | 29.8<br>(14/47)  | 85.1<br>(40/47)   | 17.0<br>(8/47)  | 97.9<br>(46/47,<br>HBV 41<br>HCV 5)     | NA   | NA   | NA          | NA    | NA   | A: 100<br>(47/47)                           | 5.2 | NA | NA                | NA               | 8.4             |
|                         | MH | 30.3<br>(10/33)  | 84.8<br>(28/33)   | 12.1<br>(4/33)  | 100<br>(33/33,<br>HBV 28<br>HCV 5)      | NA   | NA   | NA          | NA    | NA   | A: 100<br>(33/33)                           | 4.9 | NA | NA                | NA               | 8.2             |
| Yang, 2014 <sup>7</sup> | MH | 53.2<br>(84/158) | 81.0<br>(128/158) | NA              | 90.5<br>(143/158,<br>HBV 143)           | 23.3 | 41.1 | ALT<br>58.3 | 165.5 | 11.5 | A: 83.5<br>(132/158)<br>B: 16.5<br>(26/158) | NA  | NA | 48.7<br>(77/158)  | 53.8<br>(85/158) | 7.5<br>NA       |

|                          |    |                   |                   |                |                                      |      |      |                             |       |      |                                             |      |    |                   |                   |           |
|--------------------------|----|-------------------|-------------------|----------------|--------------------------------------|------|------|-----------------------------|-------|------|---------------------------------------------|------|----|-------------------|-------------------|-----------|
| Hu, 2003 <sup>4</sup>    |    | 57.8<br>(111/192) | 79.7<br>(153/192) |                | 89.6<br>(172/192,<br>HBV172)         | 21.6 | 42.1 | ALT<br>51.9                 | 171.8 | 11.3 | A: 86.5<br>(166/192)<br>B: 13.5<br>(26/192) |      |    | 43.8<br>(84/192)  | 55.7<br>(107/192) | 3.2<br>NA |
|                          | EH | 56.1<br>(194/346) | 78.6<br>(272/346) | NA             | 87.6<br>(303/346,<br>HBV303)         | 21.5 | 40.1 | ALT<br>53.1                 | 176.4 | 11.6 | A: 82.1<br>(284/346)<br>B: 17.9<br>(62/346) | NA   | NA | 40.8<br>(141/346) | 47.1<br>(163/346) | 8.1       |
|                          | MH | 23.1<br>(12/52)   | 46.2<br>(24/52)   | NA             | 46.2<br>(24/52,<br>HCV 24)           | NA   | NA   | NA                          | NA    | NA   | NA                                          | 17.4 | NA | 90.4<br>(47/52)   | 75.0<br>(39/52)   | NA        |
|                          | EH | 42.6<br>(26/61)   | 38.1<br>(24/63)   | NA             | 20.6<br>(13/63,<br>HCV 13)           | NA   | NA   | NA                          | NA    | NA   | NA                                          | 12.4 | NA | 79.4<br>(50/63)   | 52.4<br>(33/63)   | NA        |
| Cheng, 2012 <sup>5</sup> | MH | 47.6<br>(30/63)   | 47.6<br>(30/63)   | 11.1<br>(7/63) | 92.1<br>(58/63,<br>HBV 43<br>HCV 15) | 13.7 | 40.5 | ALT<br>41.0<br>AST<br>38.00 | 198.0 | 11.8 | A: 88.9<br>(56/63)<br>B: 11.1<br>(7/63)     | 8.6  | 58 | NA                | 71.4<br>(45/63)   | 7.2<br>NA |
|                          | EH | 46.3<br>(19/41)   | 36.6<br>(15/41)   | 7.3<br>(3/41)  | 85.4<br>(35/41,<br>HBV 27<br>HCV 8)  | 13.7 | 42.0 | ALT<br>49.0<br>AST<br>49.0  | 179.5 | 11.9 | A: 90.2<br>(37/41)<br>B: 7.3<br>(3/41)      | 8.1  | 82 | NA                | 63.4<br>(26/41)   | 8.5       |

|              |        |           |           |           |           |           |           |           |          |           |           |          |          |           |           |          |  |
|--------------|--------|-----------|-----------|-----------|-----------|-----------|-----------|-----------|----------|-----------|-----------|----------|----------|-----------|-----------|----------|--|
|              |        |           |           | 85.5      |           |           | ALT       |           |          |           |           |          |          |           |           |          |  |
|              | MH     | 44.1      | 79.5      | 17.7      | HBV73.1   | 15.9      | 39.7      | 47.0      | 173.9    | 11.6      | A:92.4    | 11.4     | 1991.9   | 80.6      | 58.2      | 8.6      |  |
|              |        |           |           |           | HCV11.7   |           |           | AST       |          |           | B:7.6     |          |          |           |           |          |  |
|              |        |           |           |           |           |           |           | 38.5      |          |           |           |          |          |           |           |          |  |
|              |        |           |           | 71.0-93.5 |           |           |           | ALT       |          |           | A:89.2-9  |          |          |           |           |          |  |
|              |        |           |           | HBV       |           |           |           | 38.0-56.0 | 158.2-18 |           | 4.7       |          | 654.6-33 |           |           |          |  |
|              | 95% CI | 33.4-55.3 | 70.3-86.4 | 9.0-31.9  | 55.0-85.8 | 12.4-19.4 | 37.7-41.6 | AST       | 9.7      | 11.2-11.9 | B:5.3-10. | 5.7-17.0 | 29.2     | 66.6-89.6 | 49.1-66.7 | 7.3-10.0 |  |
|              |        |           |           | HCV       |           |           |           | 29.7-47.3 |          |           | 8         |          |          |           |           |          |  |
| Polled value |        |           |           | 5.0-24.9  |           |           |           |           |          |           |           |          |          |           |           |          |  |
|              |        |           |           | 78.7      |           |           |           | ALT       |          |           | A:89.5    |          |          |           |           |          |  |
|              | EH     | 44.0      | 62.4      | 12.2      | HBV78.9   | 17.0      | 40.8      | 50.1      | 170.8    | 11.7      | B:10.5    | 7.9      | -        | 66.6      | 52.0      | 8.2      |  |
|              |        |           |           |           | HCV17.2   |           |           | AST       |          |           |           |          |          |           |           |          |  |
|              |        |           |           |           |           |           |           | -         |          |           |           |          |          |           |           |          |  |
|              |        |           |           | 51.2-92.9 |           |           |           | ALT       |          |           | A:80.2-9  |          |          |           |           |          |  |
|              |        |           |           | HBV       |           |           |           | 45.4-54.9 | 156.9-18 |           | 4.7       |          |          |           |           |          |  |
|              | 95% CI | 31.6-57.2 | 42.9-78.5 | 6.3-22.2  | 64.7-88.4 | 11.8-22.1 | 39.5-42.0 | AST       | 4.6      | 11.4-11.9 | B:5.3-19. | 4.0-11.9 | -        | 36.9-87.2 | 43.3-60.6 | 7.8-8.5  |  |
|              |        |           |           | HCV       |           |           |           | -         |          |           | 8         |          |          |           |           |          |  |
|              |        |           |           | 12.4-23.5 |           |           |           |           |          |           |           |          |          |           |           |          |  |

MH=mesohepatectomy; EH=hemi- or extended- hemihepatectomies; 95% CI=95% confidence interval; NA=not available; TACE=transarterial chemoembolization; TACI=transarterial chemoinfusion; ALT=alanine aminotransferase; AST=aspartate aminotransferase; PLT=platelet; PT=prothrombin time; ICG-R15=indocyanine green retention rate at 15 min; AFP=alpha-fetoprotein; HBV=hepatitis B virus; HCV= hepatitis C virus.

**Supplementary table 2. Extracted data and pooled values of intraoperative variables for the 20 included studies**

| Ref. Year                      | Type of Operation | Segments of Resection (number of patients) | Operation time(Mean/Median,min) (Range, min) | Occlusion Time(Mean/Median,min) (Range, min) | Transection Time(Mean, min) | Blood Loss (Mean/Median,ml)(Range, ml) | Rate of Transfusion Required (%) | Volume of Transfusion (Mean/Median,ml)(Range, ml) | Weight of Resected Liver(Mean/Median, g) (Range, g) | Section Margin (Mean/Median, cm) or (≥1cm%)or(R0%) |
|--------------------------------|-------------------|--------------------------------------------|----------------------------------------------|----------------------------------------------|-----------------------------|----------------------------------------|----------------------------------|---------------------------------------------------|-----------------------------------------------------|----------------------------------------------------|
| Zuo, 2014 <sup>3</sup>         | MH                | IV, V and VIII: 9                          |                                              |                                              |                             |                                        |                                  |                                                   |                                                     |                                                    |
| IVb,V and VIII: 8              |                   | 238                                        | 23.0                                         | NA                                           | 480                         | NA                                     | NA                               | NA                                                | NA                                                  |                                                    |
| IVa, V and VIII: 4             |                   | NA                                         | 15.0-60.0                                    | NA                                           | 200-2200                    | NA                                     | NA                               | NA                                                | NA                                                  |                                                    |
| I, IV, V and VIII: 3           |                   |                                            |                                              |                                              |                             |                                        |                                  |                                                   |                                                     |                                                    |
| Mehrabi, 2008 <sup>14</sup>    | MH                | IV, V and VIII: 48                         | 238<br>65-480                                | NA                                           | NA                          | 1120<br>100-5000                       | 66.7<br>(32/48)                  | 738<br>200-2400                                   | NA                                                  | NA                                                 |
| Chouillard, 2003 <sup>20</sup> | MH                | IV, V and VIII: 16                         | 280<br>180-420                               | NA                                           | NA                          | NA                                     | NA                               | NA                                                | NA                                                  | NA                                                 |
| Lee, 2008 <sup>19</sup>        | MH                | IV, V and VIII: 27                         | 330<br>215-669                               | NA                                           | NA                          | 1400<br>550-7000                       | NA                               | 345<br>0-3200                                     | 300<br>147-483                                      | 1.5*                                               |
| Giuliante, 2008 <sup>16</sup>  | MH                | IV, V and VIII: 18                         | 448<br>240-792                               | 60.0<br>16.0-125.0                           | NA                          | NA                                     | 27.8<br>(5/18)                   | 400<br>200-800                                    | NA                                                  | 0.6*                                               |
| Chen, 2006 <sup>12</sup>       | MH                | V and VIII: 8                              | 124.5                                        | 13.5                                         |                             | 770                                    | 46.6                             |                                                   | 761                                                 |                                                    |
| IV, V and VIII: 49             |                   | 88-243                                     | 7.0-28.0                                     | NA                                           | 230-3800                    | (27/58)                                | NA                               | 430-2150                                          | NA                                                  |                                                    |
| V and VIII: 7                  |                   | 133                                        | 12.6                                         |                                              | 420                         | 13.3                                   |                                  | 816                                               |                                                     |                                                    |
| IV, V and VIII: 53             |                   | 95-271                                     | 6.0-30.0                                     |                                              | 130-980                     | (8/60)                                 |                                  | 550-2360                                          |                                                     |                                                    |



|                                  |    |                                        |          |            |      |          |          |          |          |       |
|----------------------------------|----|----------------------------------------|----------|------------|------|----------|----------|----------|----------|-------|
| Arkadopoulos, 2012 <sup>17</sup> |    |                                        | 180      | 46.0       |      | 650      |          | 440      |          |       |
|                                  | MH | I, IV, V and VIII: 36                  | 120-230  | 36.0-61.0  | NA   | 300-1100 | NA       | 0-800    | NA       | NA    |
|                                  |    |                                        | 150      | 28.0       |      | 400      |          | 240      |          |       |
|                                  |    |                                        | 115-190  | 22.0-45.0  |      | 200-700  |          | 0-1000   |          |       |
| Chen, 2008 <sup>13</sup>         | MH | IV, V and VIII: 248                    | 174      | 10.8       | NA   | 510      | 20.3     | NA       | 230      | 57.8† |
|                                  |    | I, IV, V and VIII: 8                   | NA       | NA         |      | NA       | (52/256) | NA       | NA       |       |
| Chen, 2007 <sup>10</sup>         |    | IV, V and VIII: 82                     | 177      | 15.2       | 21.0 | 790      | 44.9     |          |          | 19.1† |
|                                  | MH | I, IV, V and VIII: 7                   | NA       | NA         |      | NA       | (40/89)  | NA       | NA       |       |
|                                  |    | IV, V and VIII: 141                    | 115      | 11.3       | 16.0 | 420      | 24.8     |          |          | 16.6† |
|                                  |    | I, IV, V and VIII: 16                  | NA       | NA         |      | NA       | (39/157) |          |          |       |
| Dai, 2008 <sup>15</sup>          | MH | IV, V and VIII: 17                     | 245      | NA         | NA   | NA       | 17.6     | NA       | NA       | 41.2† |
|                                  |    |                                        | 190-330  |            |      |          | (3/17)   | 300-1500 |          |       |
| Miao, 2009 <sup>21</sup>         | MH | IV, V and VIII: 47                     | 211      | 50.0       | NA   | 580      | 29.8     | NA       | NA       | 27.7† |
|                                  |    |                                        | 125-330  | 11.0-107.0 |      | 180-4500 | (14/47)  | 300-4000 |          |       |
| Hasegawa, 1989 <sup>18</sup>     |    | IV, V and VIII: 13                     | NA       | NA         | NA   | 2850     | NA       | NA       | NA       | NA    |
|                                  | MH | IV, V, VIII, VII+part of II and III: 1 | 300-660  |            |      | 600-7500 |          |          | 370-1440 |       |
|                                  |    | V, VIII+part of IV: 2                  |          |            |      |          |          |          |          |       |
| Gallagher, 2013 <sup>11</sup>    | MH | IV, V and VIII: 21                     | 627      | NA         | NA   | 1590     | 57.1     | NA       | NA       | 0.5*  |
|                                  |    |                                        | 240-1149 |            |      | 120-3750 | (12/21)  |          |          | 100§  |
| Wu, 1999 <sup>8</sup>            | MH | IV, V and VIII: 15                     | 474      | 131.0      | NA   | 2450     | 66.7     | 1100     | 859      | 0.5*  |
|                                  |    |                                        | 342-660  | 68.4-184.4 |      | 720-5350 | (10/15)  | 0-3000   | 290-1750 |       |
|                                  | EH | extended right lobectomy: 14           | 348      | 58.4       | NA   | 1863     | 72.0     | 768      | NA       | NA    |
|                                  |    | extended left lobectomy: 11            | 270-630  | 36-108.5   |      | 520-4360 | (18/25)  | 0-3000   |          |       |
| Scudamore, 2000 <sup>9</sup>     | MH | IV, V, VIII±I: 18                      | 238      | 45.0       | NA   | 914      | 44.4     | NA       | 560      | NA    |
|                                  |    |                                        | 115-435  | 19.0-74.0  |      | NA       | (8/18)   |          | NA       |       |

|                         |                                 |                                      |         |          |      |          |           |        |       |       |
|-------------------------|---------------------------------|--------------------------------------|---------|----------|------|----------|-----------|--------|-------|-------|
| Qiu, 2013 <sup>1</sup>  | EH                              | extended right lobectomy: 32         | 304     | 39.0     | NA   | 1628     | NA        | NA     | 1500  | NA    |
|                         |                                 | extended left lobectomy: 11          | NA      | NA       | NA   | NA       | NA        | NA     | NA    | NA    |
|                         | MH                              | V, IVb+part of IVa and VIII: 88      | 259     |          |      | 634      | 33.9      | 820    |       |       |
|                         |                                 | IVa, VIII+part of V and IVb: 56      | NA      | NA       | NA   | NA       | (99 /292) | NA     | NA    | NA    |
| Chen, 2014 <sup>6</sup> | EH                              | Irregular resection: 59              |         |          |      |          |           |        |       |       |
|                         |                                 | IV, V and VIII± I: 19                |         |          |      |          |           |        |       |       |
|                         | MH                              | IV, V and VIII ± I: 70               |         |          |      |          |           |        |       |       |
|                         |                                 | extended hemihepatectomy: 138        | 211     | NA       | NA   | 570      | 24.6      | 750    | NA    | NA    |
| Yang, 2014 <sup>7</sup> | EH                              |                                      | NA      |          | NA   | (34/138) | NA        | NA     | NA    |       |
|                         |                                 | IV, V and VIII±I: 118                | 244     | 30.3     | NA   | NA       | 34.7      | 456    | NA    | 66.9† |
|                         | MH                              |                                      | 100-450 | 0.0-90.0 |      |          | (41/118)  | 0-2400 |       |       |
|                         |                                 | extended right lobectomy: 47         | 225     | 28.7     |      |          | 36.2      | 532    |       | 83.0† |
| Hu, 2003 <sup>4</sup>   | EH                              |                                      | 165-370 | 5-60     | NA   | NA       | (17/47)   | 0-3200 | NA    |       |
|                         |                                 | extended left lobectomy: 33          | 219     | 25.4     |      |          | 30.3      | 493    |       | 83.0† |
|                         | MH                              |                                      | 162-290 | 0-35     |      |          | (10/33)   | 0-2600 |       |       |
|                         |                                 | IV, V, and VIII: 350                 | NA      | 17.9     | 15.2 | 951      | 37.3      |        | NA    | 52.5† |
| Hu, 2003 <sup>4</sup>   | EH                              |                                      |         | NA       |      | NA       | (59/158)  | NA     | NA    |       |
|                         |                                 | hemihepatectomy or less: 346         | NA      | 16.3     | 14.2 | 903      | 31.8      |        |       | 64.1† |
|                         | MH                              |                                      |         | 15.8     | 13.9 | 855      | 26.3      | NA     | NA    | 61.6† |
|                         |                                 | (IV, V and VIII) or (V and VIII): 52 | 265     | NA       | NA   | NA       | NA        | 1030   | NA    | 57.7† |
| EH                      |                                 |                                      | NA      | NA       | NA   | (91/346) | NA        | NA     | 74.6† |       |
|                         | Hemihepatectomy or extended: 63 | 264                                  | NA      | NA       | NA   | NA       | 440       | NA     | 74.6† |       |
|                         |                                 |                                      | NA      |          |      |          | NA        |        |       |       |

|                          |                          |                                  |           |           |           |           |           |          |            |            |
|--------------------------|--------------------------|----------------------------------|-----------|-----------|-----------|-----------|-----------|----------|------------|------------|
| Cheng, 2012 <sup>5</sup> | MH                       | I, IV, V and VIII: 63            | 230       | NA        | NA        | 500       | 12.7      | 600      | 227        | 7.4†       |
|                          |                          |                                  | NA        | NA        | NA        | NA        | (8/63)    | NA       | NA         |            |
|                          | EH                       | Hemihepatectomy or extended: 41  | 316       | NA        | NA        | 750       | NA        | 600      | 590        | 21.1†      |
|                          |                          |                                  | NA        | NA        | NA        | NA        | NA        | NA       | NA         |            |
|                          | MH                       | Resection of Segment I%: 5.1     | 245       | 29.5      | 16.3      | 720       | 34.0      | 726      | 526        | 40.1†      |
|                          | 95% CI                   | Resection of Segment I%:2.1-12.1 | 219-272   | 26.2-32.8 | 13.2-19.3 | 578-861   | 28.1-40.5 | 527-925  | 179-872    | 26.0-56.1† |
| Polled value             |                          | Hemihepatectomy%:38.4            |           |           |           |           |           |          |            |            |
|                          | EH                       | Extended:61.6                    | 274       | 35.0      | -         | 1001      | 35.1      | 592      | 1029       | 62.3†      |
|                          |                          | Left extended%:36.9              |           |           |           |           |           |          |            |            |
|                          |                          | Right extended%:63.1             |           |           |           |           |           |          |            |            |
|                          |                          | Hemihepatectomy%:1.1-97.2        |           |           |           |           |           |          |            |            |
| 95% CI                   | Extended%:2.8-98.9       | 236-313                          | 17.3-52.7 | -         | 743-1260  | 23.7-48.5 | 474-709   | 138-1920 | 40.3-80.1† |            |
|                          | Left extended%:26.7-48.4 |                                  |           |           |           |           |           |          |            |            |
|                          |                          | Right extended%:51.6-73.3        |           |           |           |           |           |          |            |            |

MH=mesohepatectomy; EH=hemi- or extended- hemihepatectomies; 95% CI=95% confidence interval; NA=not available; R0=tumor-free margins; \* =mean or median section margin; †=section margin  $\geq$ 1 cm%; §=R0%.

**Supplementary table 3. Extracted data and pooled values of postoperative variables for the 20 included studies**

| Ref. Year                      | Type of Operation | Differentiation(Edmondson-Steiner grade) (%) | Overall Morbidity(%) | Recurrence(%) | Reoperation(%) | Rate of Liver Failure (%) | Mortality (%) | Causes for Mortality and number of patients | Postoperative Stay(Mean/Median, d)(Range, d) * | Median OS(m) and Median DFS(m) * | 1-year OS and DFS (%) * | 3-year OS and DFS (%) * | 5-year OS and DFS (%) * | 6-year OS and DFS (%) * |
|--------------------------------|-------------------|----------------------------------------------|----------------------|---------------|----------------|---------------------------|---------------|---------------------------------------------|------------------------------------------------|----------------------------------|-------------------------|-------------------------|-------------------------|-------------------------|
| Zuo, 2014 <sup>3</sup>         | MH                | NA                                           | 33.3 (8/24)          | NA            | NA             | NA                        | NA            | NA                                          | NA                                             | NA                               | 76.0 NA                 | 46.0 NA                 | NA                      | NA                      |
| Mehrabi, 2008 <sup>14</sup>    | MH                | NA                                           | 27.1 (13/48)         | NA            | NA             | 2.1 (1/48)                | 2.1 (1/48)    | liver failure:1                             | 15.8 (6-104)                                   | NA                               | NA                      | NA 47.9                 | NA                      | NA                      |
| Chouillard, 2003 <sup>20</sup> | MH                | NA                                           | 18.8 (3/16)          | NA            | NA             | NA                        | 0.0 (0/16)    | -                                           | NA                                             | NA                               | NA                      | NA                      | NA                      | NA                      |
| Lee, 2008 <sup>19</sup>        | MH                | NA                                           | 44.4 (12/27)         | 29.6 (8/27)   | NA             | NA                        | NA            | NA                                          | NA                                             | NA                               | NA                      | NA                      | NA                      | NA                      |
| Giuliante, 2008 <sup>16</sup>  | MH                | NA                                           | 33.3 (6/18)          | 22.2 (4/18)   | NA             | NA                        | 0.0 (0/18)    | -                                           | 18.0                                           | NA                               | NA                      | NA                      | NA                      | NA                      |
| Chen, 2006 <sup>12</sup>       | MH                | NA                                           | 29.3 (17/58)         |               | NA             | 3.4 (2/58)                | 1.7 (1/58)    | liver failure:1                             | NA                                             | NA                               | NA                      | NA                      | NA                      | NA                      |
|                                |                   |                                              | 31.7 (19/60)         |               | NA             | 3.3 (2/60)                | 0.0 (0/60)    | -                                           |                                                |                                  |                         |                         |                         |                         |

|                                  |    |    |                  |                   |                |                |                 |                             |     |     |      |      |      |      |
|----------------------------------|----|----|------------------|-------------------|----------------|----------------|-----------------|-----------------------------|-----|-----|------|------|------|------|
| Arkadopoulos, 2012 <sup>17</sup> |    |    | 37.5<br>(6/16)   |                   |                |                | 0.0<br>(0/16)   |                             |     |     |      |      |      |      |
|                                  | MH | NA | 45<br>(9/20)     | NA                | NA             | NA             | 0.0<br>(0/20)   | -                           | NA  | NA  | NA   | NA   | NA   | NA   |
| Chen, 2008 <sup>13</sup>         |    |    | 28.1<br>(72/256) | 82.8<br>(212/256) |                |                | 0.4%<br>(1/256) |                             | NA  | NA  | 36.9 | 77.0 | 49.8 | 35.1 |
|                                  | MH | NA |                  |                   | NA             | NA             |                 | NA                          | NA  | NA  | 16.0 | 59.1 | 28.8 | 17.0 |
| Chen, 2007 <sup>10</sup>         |    |    | 34.8<br>(31/89)  | 79.8<br>(71/89)   | 0.0<br>(0/89)  | 2.2<br>(2/89)  | 3.4<br>(3/89)   | liver failure:2<br>sepsis:1 |     | NA  | 57.0 | 87.1 | 62.9 | 46.2 |
|                                  | MH | NA |                  |                   |                |                |                 |                             | NA  | NA  | 36.0 | 75.0 | 46.2 | 31.8 |
|                                  |    |    | 24.2<br>(38/157) | 86.6<br>(136/157) | 0.0<br>(0/157) | 0.6<br>(1/157) | 0.6<br>(1/157)  | liver failure:1             |     | NA  | 41.0 | 82.2 | 54.4 | 31.7 |
|                                  |    |    |                  |                   |                |                |                 |                             | NA  | NA  | 28.0 | 69.6 | 38.0 | 16.5 |
| Dai, 2008 <sup>15</sup>          |    |    | 47.1<br>(8/17)   | NA                | NA             | 0.0<br>(0/17)  | 0.0<br>(0/17)   | -                           |     | NA  | NA   | NA   | NA   | NA   |
|                                  | MH | NA |                  |                   |                |                |                 |                             | NA  | NA  | NA   | NA   | NA   | NA   |
| Miao, 2009 <sup>21</sup>         |    |    | 34.0<br>(16/47)  | NA                | NA             | 0.0<br>(0/47)  | 0.0<br>(0/47)   | -                           |     | NA  | NA   | NA   | NA   | 41.0 |
|                                  | MH | NA |                  |                   |                |                |                 |                             | NA  | NA  | NA   | NA   | NA   | NA   |
| Hasegawa, 1989 <sup>18</sup>     |    |    | 37.5<br>(6/16)   | 68.8<br>(11/16)   | 6.3<br>(1/16)  | 6.3<br>(1/16)  | 6.3<br>(1/16)   | liver failure:1             |     | NA  | 34.0 | 81.3 | 43.8 | 37.5 |
|                                  | MH | NA |                  |                   |                |                |                 |                             | NA  | NA  | NA   | NA   | NA   | 25.0 |
| Gallagher, 2013 <sup>11</sup>    |    |    | 42.9<br>(9/21)   | 33.3<br>(7/21)    | 23.8<br>(5/21) | 4.8<br>(1/21)  | 4.8<br>(1/21)   | multiorgan<br>failure:1     |     | NA  | 32.3 | 90.5 | 66.8 | 66.8 |
|                                  | MH | NA |                  |                   |                |                |                 |                             | NA  | NA  | 15.5 | 65.0 | 34.8 | 34.8 |
| Wu, 1999 <sup>8</sup>            |    |    | 20.0<br>(3/15)   | 93.3<br>(14/15)   | NA             | 0.0<br>(0/15)  | 0.0<br>(0/15)   | -                           |     | NA  | 33   | 67.0 | 44.0 | 30.0 |
|                                  | MH | NA |                  |                   |                |                |                 |                             | NA  | NA  | 15.0 | 53.0 | 31.0 | 20.0 |
|                                  |    |    | 36.0<br>(9/25)   | NA                | NA             | 8.0<br>(2/25)  | 4.0<br>(1/25)   | liver failure:1             |     | NA  | NA   | NA   | NA   | NA   |
|                                  | EH | NA |                  |                   |                |                |                 |                             | NA  | NA  | 38.0 | 19.0 | NA   | 9.0  |
| Scudamore, 2000 <sup>9</sup>     |    |    | 61.1<br>(11/18)  | NA                | NA             | NA             | 0.0<br>(0/18)   | -                           |     | 9.0 | NA   | NA   | NA   | NA   |
|                                  | MH | NA |                  |                   |                |                |                 |                             | 9.0 | NA  | NA   | NA   | NA   | NA   |

|                         |    |                                                          |                  |                   |                |                |                |                                                         |                 |      |      |      |      |      |    |
|-------------------------|----|----------------------------------------------------------|------------------|-------------------|----------------|----------------|----------------|---------------------------------------------------------|-----------------|------|------|------|------|------|----|
| Qiu, 2013 <sup>1</sup>  | EH | NA                                                       | 74.4<br>(32/43)  | NA                | NA             | NA             | 0.0<br>(0/43)  | -                                                       | 16.0            | NA   | NA   | NA   | NA   | NA   |    |
|                         | MH | NA                                                       | 19.9<br>(58/292) | NA                | 0.7<br>(2/292) | NA             | 0.7<br>(2/292) | uncontrollable<br>bleeding: 1<br>sepsis: 1              | NA              | NA   | NA   | NA   | NA   | NA   |    |
| Chen, 2014 <sup>6</sup> | EH | NA                                                       | 52.2<br>(72/138) | NA                | 0.0<br>(0/138) | NA             | 1.4<br>(2/138) | liver failure:1                                         | NA              | NA   | NA   | NA   | NA   | NA   |    |
|                         | MH | I: 24.6(29/118)<br>II: 56.8(67/118)<br>III: 18.6(22/118) | 37.3<br>(44/118) | NA                | NA             | 1.7<br>(2/118) | 2.5<br>(3/118) | liver failure: 2<br>severe<br>pulmonary<br>infection: 1 | 17.7<br>(7-66)  | 30.0 | 67.8 | 45.5 | 28.9 | 16.9 | NA |
|                         | EH | I: 36.2(17/47)<br>II: 46.8(22/47)<br>III: 17.0(8/47)     | 55.3<br>(26/47)  | NA                | NA             | 10.6<br>(5/47) | 8.5<br>(4/47)  | liver failure: 3<br>postoperative<br>bleeding: 1        | 17.2<br>(11-53) | 30.0 | 73.8 | 44.5 | 30.3 | 27.4 | NA |
| Yang, 2014 <sup>7</sup> | EH | I: 33.3(11/33)<br>II: 45.5(15/33)<br>III: 21.2(7/33)     | 24.2<br>(8/33)   | NA                | NA             | 6.1<br>(2/33)  | 3.0<br>(1/33)  | liver failure:1                                         | 15.6<br>(10-24) | 22.7 | 61.2 | 37.5 | 27.4 | NA   |    |
|                         | MH | I+II: 54.4(86/158)<br>III+IV: 45.6(72/158)               | 13.9<br>(22/158) | 69.6<br>(110/158) | NA             | NA             | 0.0<br>(0/158) | -                                                       | NA              | 33.0 | 79.0 | 47.0 | 30.0 | 26.0 | NA |
| Hu, 2003 <sup>4</sup>   | EH | NA                                                       | 11.5<br>(22/192) | 61.5<br>(118/192) | NA             | NA             | 0.0<br>(0/192) | -                                                       | NA              | 37.0 | 80.0 | 52.0 | 31.0 | 25.0 | NA |
|                         | EH | NA                                                       | 11.3<br>(39/346) | 64.7<br>(224/346) | NA             | NA             | 0.6<br>(2/346) | liver failure:2                                         | NA              | 40.5 | 84.0 | 55.0 | 32.0 | 23.0 | NA |
|                         | MH | I+II: 65.4(34/52)<br>III+IV: 34.6(18/52)                 | 17.3<br>(9/52)   | 61.5<br>(32/52)   | 5.8<br>(3/52)  | NA             | 0.0<br>(0/52)  | -                                                       | NA              | 51.0 | 89.0 | 75.0 | 70.0 | 23.0 | NA |

|                          |                  |                     |           |           |           |          |          |                      |            |           |           |           |           |           |
|--------------------------|------------------|---------------------|-----------|-----------|-----------|----------|----------|----------------------|------------|-----------|-----------|-----------|-----------|-----------|
| Cheng, 2012 <sup>5</sup> | EH               | I+II: 46.0(29/63)   | 19.0      | 54.0      | 12.7      | 3.2      | 3.2      | liver failure:2      | NA         | 47.0      | 94.0      | 75.0      | 59.0      | NA        |
|                          |                  | III+IV: 54.0(34/63) | (12/63)   | (34/63)   | (8/63)    | (2/63)   | (2/63)   |                      |            | 25.0      | 74.0      | 44.0      | 42.0      |           |
|                          | MH               | I+II: 39.7(25/63)   | 12.7      | 61.9      | 6.3       | 3.2      | 7.9      | multiorgan failure:5 | 10.0       | 42.0      | 87.5      | 57.0      | 53.1      | NA        |
|                          |                  | III+IV: 60.3(38/63) | (8/63)    | (39/63)   | (4/63)    | (2/63)   | (5/63)   |                      |            | 9.8       | 50.0      | 27.0      | 15.0      |           |
| Polled value             | EH               | I+II: 34.1(14/41)   | 14.6      | 41.5      | NA        | 4.9      | 7.3      | multiorgan failure:3 | 11.2       | 35.0      | 89.5      | 51.0      | 66.2      | NA        |
|                          |                  | III+IV: 65.9(27/41) | (6/41)    | (17/41)   |           | (2/41)   | (3/41)   |                      |            | 11.2      | 50.0      | 38.9      | 38.9      |           |
|                          | MH               | I+II:61.4           | 29.2      | 62.6      | 3.9       | 2.5      | 2.0      | 52.2‡                | 13.5       | 38.2      | 80.8      | 54.0      | 42.5      | 27.3      |
|                          |                  | III+IV:38.6         |           |           |           |          |          |                      |            | 16.4      | 60.1      | 33.2      | 19.7      | -         |
| 95% CI                   | I+II:42.9-77.1   |                     | 24.1-34.8 | 49.6-74.0 | 1.1-12.7  | 1.5-4.0  | 1.2-3.3  | 28.6-75.0‡           | 8.7-18.2   | 34.0-42.8 | 76.1-85.4 | 47.8-60.2 | 33.9-51.1 | 11.6-42.9 |
|                          | III+IV:22.9-57.1 |                     |           |           |           |          |          |                      |            | 12.6-21.3 | 55.0-65.3 | 29.1-37.4 | 16.2-23.1 | -         |
| Polled value             | EH               | I+II:55.5           | 32.9      | 55.0      | 2.9       | 6.7      | 2.8      | 71.8‡                | 14.2       | 37.7      | 85.8      | 56.6      | 46.0      | -         |
|                          |                  | III+IV:44.5         |           |           |           |          |          |                      |            | 19.8      | 60.1      | 36.3      | 31.3      | -         |
|                          | 95% CI           | I+II:26.8-80.9      |           | 17.0-54.0 | 41.4-67.9 | 0.1-51.6 | 3.9-11.2 | 1.3-5.9              | 44.5-89.0‡ | 9.7-18.7  | 30.4-46.7 | 78.3-93.2 | 44.9-68.3 | 29.7-62.2 |
|                          |                  | III+IV:19.1-73.2    |           |           |           |          |          |                      |            | 16.7-23.4 | 51.0-69.2 | 30.3-42.4 | 22.0-40.6 |           |

MH=mesohepatectomy; EH=hemi- or extended- hemihepatectomies; 95% CI=95% confidence interval; NA=not available; OS=overall survival; DFS=disease free survival;

\*=the value of upper line and lower line for OS and DFS respectively; ‡=liver failure%

**Supplementary table 4. Indications Reported for MH and EH**

| Type of Indication                | MH                                    |               | EH                                   |               | <i>p</i> |
|-----------------------------------|---------------------------------------|---------------|--------------------------------------|---------------|----------|
|                                   | Number reported<br>( <i>n</i> =1782 ) | Frequency (%) | Number reported<br>( <i>n</i> =736 ) | Frequency (%) |          |
| <b>Primary malignant diseases</b> | 1701                                  | 95.5          | 704                                  | 95.7          | 0.828    |
| Hepatocellular carcinoma          | 1683                                  | 94.4          | 687                                  | 93.3          | 0.285    |
| Cholangiocarcinoma                | 9                                     | 0.5           | 10                                   | 1.4           | 0.024    |
| Gallbladder carcinoma             | 7                                     | 0.4           | 7                                    | 1             | 0.087    |
| Hepatosarcoma                     | 2                                     | 0.1           | -                                    | -             | -        |
| <b>Metastases</b>                 | 66                                    | 3.7           | 28                                   | 3.8           | 0.904    |
| Colorectal                        | 40                                    | 2.2           | 22                                   | 3             | 0.273    |
| Pancreas                          | 3                                     | 0.2           | -                                    | -             | -        |
| Kidney                            | 2                                     | 0.1           | -                                    | -             | -        |
| Others                            | 9                                     | 0.5           | -                                    | -             | -        |
| Not Specified                     | 12                                    | 0.7           | 6                                    | 0.8           | 0.701    |
| <b>Benign diseases</b>            | 15                                    | 0.8           | 4                                    | 0.5           | 0.252    |
| Focal nodular hyperplasia         | 10                                    | 0.6           | 3                                    | 0.4           | 0.625    |
| Hemangioma                        | 2                                     | 0.1           | -                                    | -             | -        |
| Gastrointestinal stromal tumor    | 1                                     | 0.1           | -                                    | -             | -        |
| Others                            | 2                                     | 0.1           | -                                    | -             | -        |
| Not Specified                     | -                                     | -             | 1                                    | 0.1           | -        |

MH=mesohepatectomy; EH=hemi- or extended- hemihepatectomies



**Supplementary table 5. Postoperative Complications Reported for MH and EH**

| Type of complication              | MH                                  |               | EH                                  |               | <i>p</i> |
|-----------------------------------|-------------------------------------|---------------|-------------------------------------|---------------|----------|
|                                   | Number reported<br>( <i>n</i> =481) | Frequency (%) | Number reported<br>( <i>n</i> =178) | Frequency (%) |          |
| <b>Surgical complications</b>     | 113                                 | 23.5          | 47                                  | 26.4          | 0.439    |
| Bilioma/bile leakage              | 65                                  | 13.5          | 12                                  | 6.7           | 0.016    |
| Wound infection                   | 33                                  | 6.9           | 28                                  | 15.7          | 0        |
| Abdomen abscess                   | 14                                  | 2.9           | 6                                   | 3.4           | 0.76     |
| Others                            | 1                                   | 0.2           | 1                                   | 0.6           | 0.47     |
| <b>Medical complications</b>      | 368                                 | 76.5          | 131                                 | 73.6          | 0.439    |
| Pleural effusion                  | 166                                 | 34.5          | 29                                  | 16.3          | 0        |
| Ascites                           | 87                                  | 18.1          | 32                                  | 18.0          | 0.974    |
| Pulmonary infection               | 33                                  | 6.9           | 14                                  | 7.9           | 0.656    |
| Delayed jaundice                  | 14                                  | 2.9           | 28                                  | 15.7          | 0        |
| Liver failure                     | 14                                  | 2.9           | 13                                  | 7.3           | 0.012    |
| Haemorrhage/Stress ulcer bleeding | 13                                  | 2.7           | 6                                   | 3.4           | 0.646    |
| Others                            | 41                                  | 8.5           | 9                                   | 5.1           | 0.184    |

**Supplementary table 6. Postoperative Tumor Recurrence Reported for MH and EH**

| Type of Recurrence             | MH                                  |               | EH                                  |               | <i>P</i> |
|--------------------------------|-------------------------------------|---------------|-------------------------------------|---------------|----------|
|                                | Number reported<br>( <i>n</i> =742) | Frequency (%) | Number reported<br>( <i>n</i> =250) | Frequency (%) |          |
| <b>Intrahepatic recurrence</b> | 585                                 | 78.8          | 194                                 | 77.6          | 0.679    |
| Single lesion                  | 70                                  | 9.4           | 4                                   | 1.6           | -        |
| Multiple lesion                | 153                                 | 20.6          | 9                                   | 3.6           | -        |
| Not Specified                  | 362                                 | 48.8          | 181                                 | 72.4          | -        |
| <b>Extrahepatic recurrence</b> | 157                                 | 21.2          | 56                                  | 22.4          | 0.679    |
| Lung metastasis                | 47                                  | 6.3           | -                                   | -             | -        |
| Other organs metastasis        | 42                                  | 5.7           | -                                   | -             | -        |
| Not Specified                  | 68                                  | 9.2           | 56                                  | 22.4          | -        |

MH=mesohepatectomy; EH=hemi- or extended- hemihepatectomies

**Supplementary table 7. Methods of hepatic blood occlusion Reported for MH**

| <b>Type of Occlusion Method</b>                                                                         | <b>Feature</b>                                                                                                                                       | <b>Intermittent%</b> | <b>Number reported (n=1585)</b> | <b>Frequency (%)</b> |
|---------------------------------------------------------------------------------------------------------|------------------------------------------------------------------------------------------------------------------------------------------------------|----------------------|---------------------------------|----------------------|
| Occlusion of hepatic blood inflow /Pringle maneuver <sup>1, 3, 5, 7-9, 12, 14-16, 18, 23</sup>          | Clamping of the hepatic pedicle                                                                                                                      | 97.9                 | 985                             | 62.1                 |
| Hemihepatic vascular occlusion /selective inflow blood occlusion <sup>5-9, 13, 17, 20-23</sup>          | Clamping of the ipsilateral hepatic artery and portal vein                                                                                           | 96.3                 | 354                             | 22.3                 |
| Hepatic vascular exclusion (HVE) <sup>3</sup>                                                           | Sequential clamping of portal triad and the inferior vena cava(IVC) both above and below the liver                                                   | 100                  | 3                               | 0.2                  |
| Modified technique of hepatic vascular exclusion (MTHVE) <sup>14, 15</sup>                              | Sequential clamping of portal triad and the IVC below the liver                                                                                      | 100                  | 201                             | 12.7                 |
| Extraparenchymal control of hepatic veins/Selective hepatic vascular exclusion (SHVE) <sup>18, 19</sup> | Sequential clamping of hepatic pedicle, right hepatic vein (RHV), the left hepatic vein (LHV) and the middle hepatic vein (MHV)                      | 100                  | 22                              | 1.4                  |
| Sequential hemihepatic vascular control (SHHVC) <sup>19</sup>                                           | Sequential clamping of left portal pedicle, left and middle hepatic veins→left transection→Outflow and inflow restored→the same process on the right | -                    | 20                              | 1.3                  |

**Supplementary table 8. Terminology of MH**

| <b>Year</b> | <b>First author</b> | <b>Terms</b>                        | <b>title of article</b>                                                                                       |
|-------------|---------------------|-------------------------------------|---------------------------------------------------------------------------------------------------------------|
| 1961        | Pack                | middle hepatic lobectomy            | Middle hepatic lobectomy for cancer <sup>28</sup>                                                             |
| 1972        | McBride             | central hepatectomy                 | Cancer of the right lobe of the liver: a variety of operative procedures <sup>34</sup>                        |
| 1977        | Foster              | middle lobectomy                    | Solid liver tumors <sup>29</sup>                                                                              |
| 1987        | Lin TY              | middle hepatectomy                  | Role of surgery in the treatment of primary carcinoma of the liver: A 31-year experience <sup>30</sup>        |
| 1989        | Hasegawa            | central bisegmentectomy             | Central bisegmentectomy of the liver: experience in 16 patients <sup>20</sup>                                 |
| 1998        | Billingsley         | Central hepatectomy/mesohepatectomy | Segment-oriented hepatic resection in the management of malignant neoplasms of the liver <sup>31</sup>        |
| 1999        | Wu C C              | Mesohepatectomy                     | Mesohepatectomy for centrally located hepatocellular carcinoma: an appraisal of a rare procedure <sup>8</sup> |
| 2002        | La Quaglia MP       | Central hepatic resection           | Central hepatic resection for pediatric tumors <sup>32</sup>                                                  |
| 2008        | Lee JG              | central bisectionectomy             | Central bisectionectomy for centrally located hepatocellular carcinoma <sup>21</sup>                          |

Supplementary forest plots [posted as supplied by author]

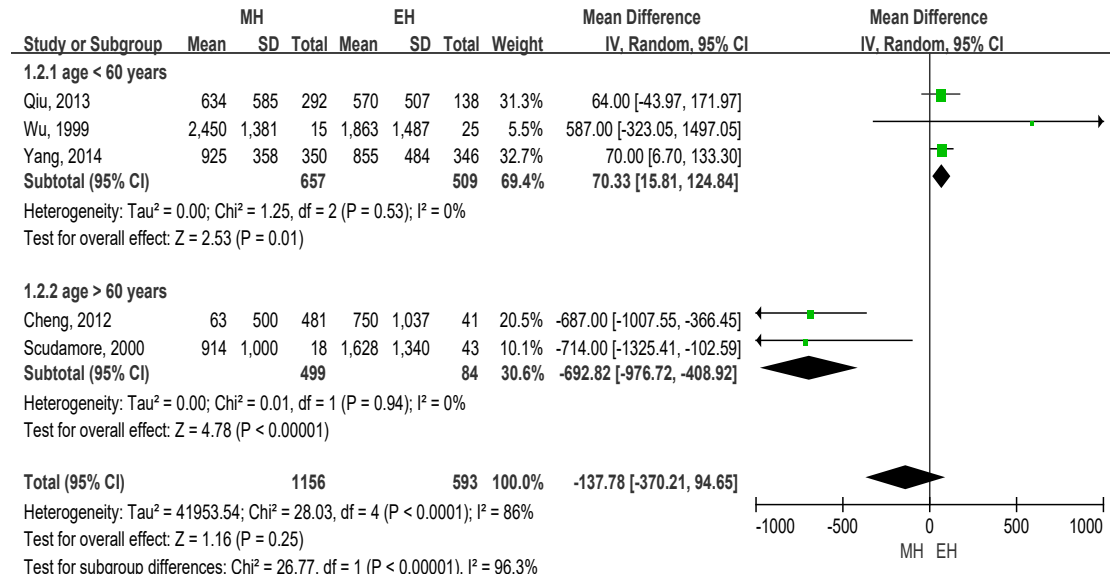

Fig A Subgroup analysis of blood loss by mean age of patients

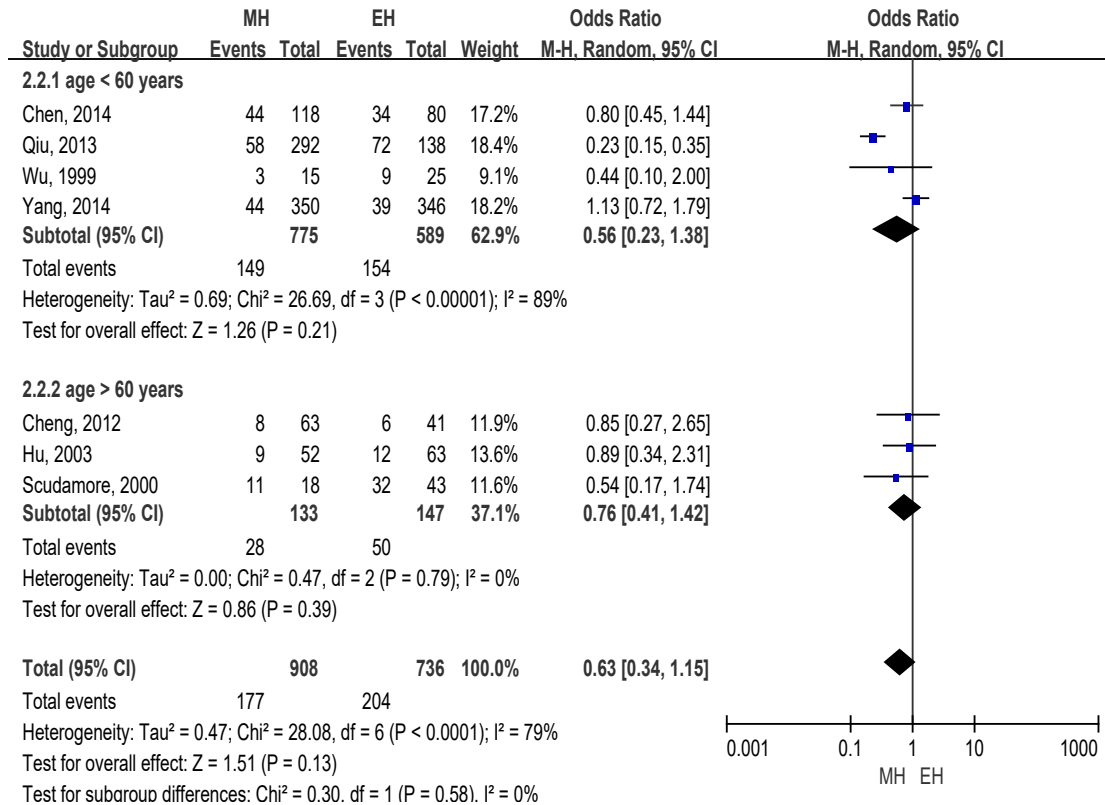

Fig B1 Subgroup analysis of morbidity rate by mean age of patients (the study Hu,2003 grouped to age>60years)( because study Hu,2003 failed to provide the age data)

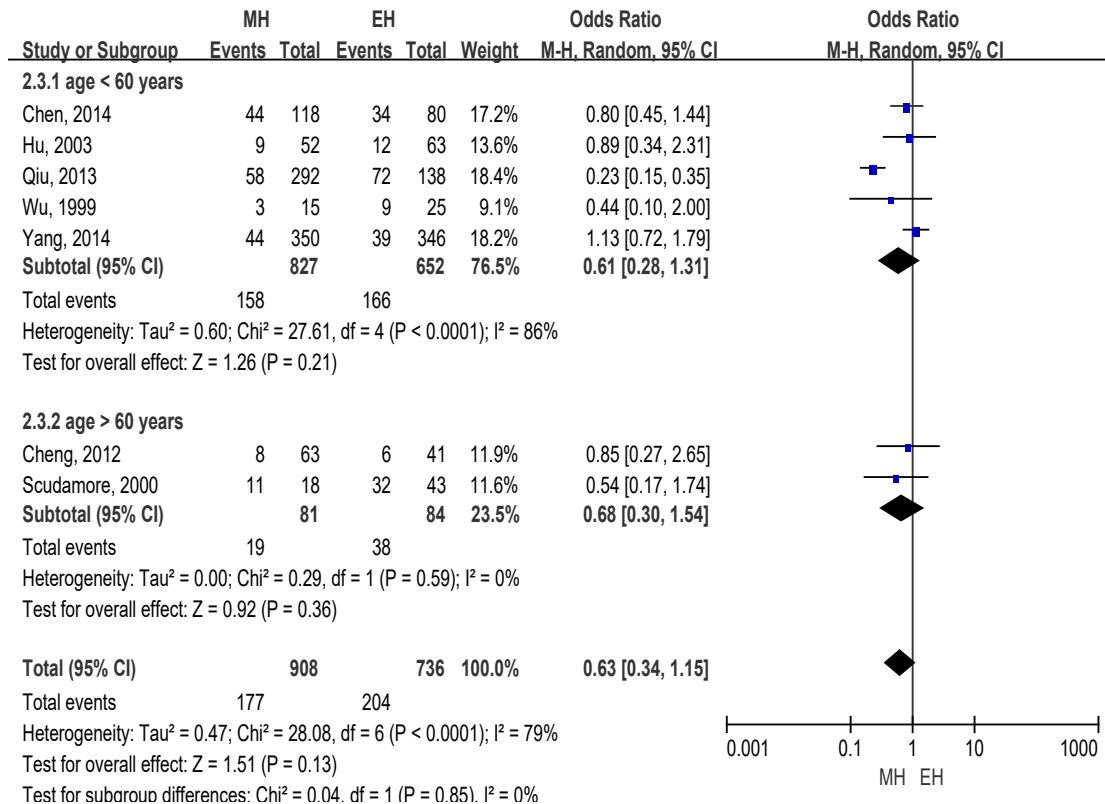

Fig B2 Subgroup analysis of morbidity rate by mean age of patients (the study Hu,2003 grouped to age<60years)

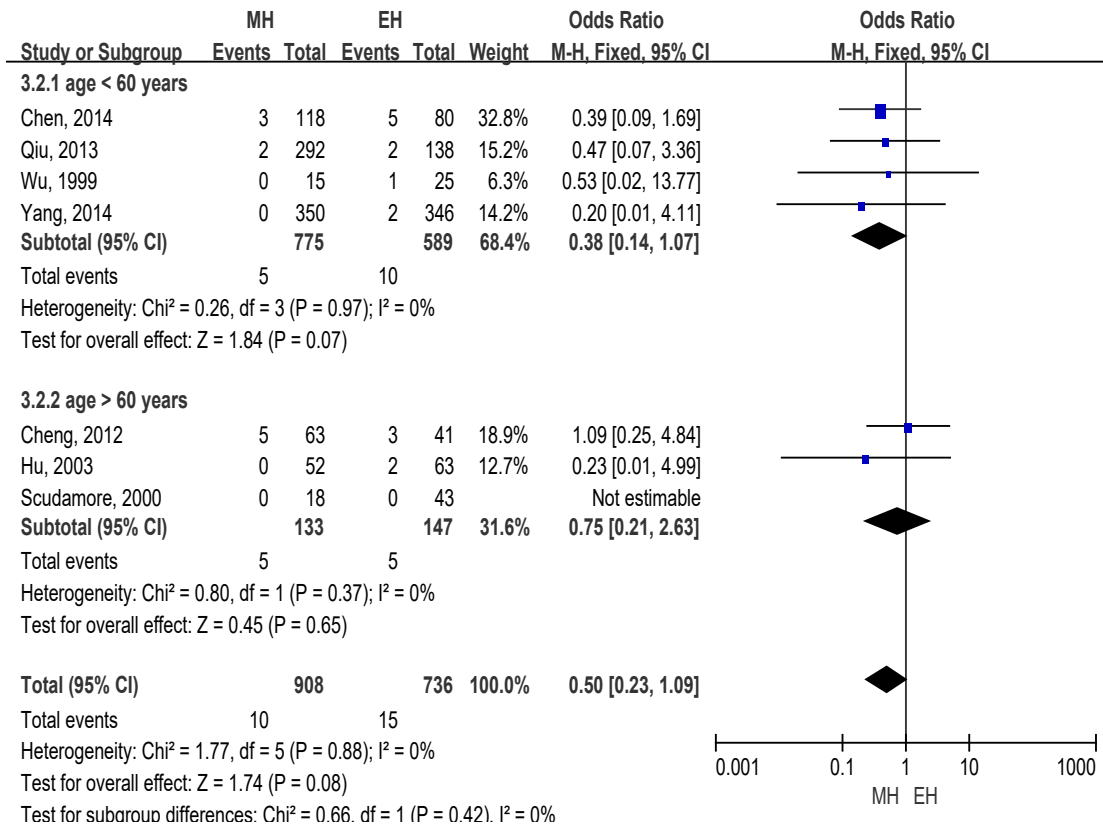

Fig C1 Subgroup analysis of mortality rate by mean age of patients (the study Hu,2003 grouped to age>60years)

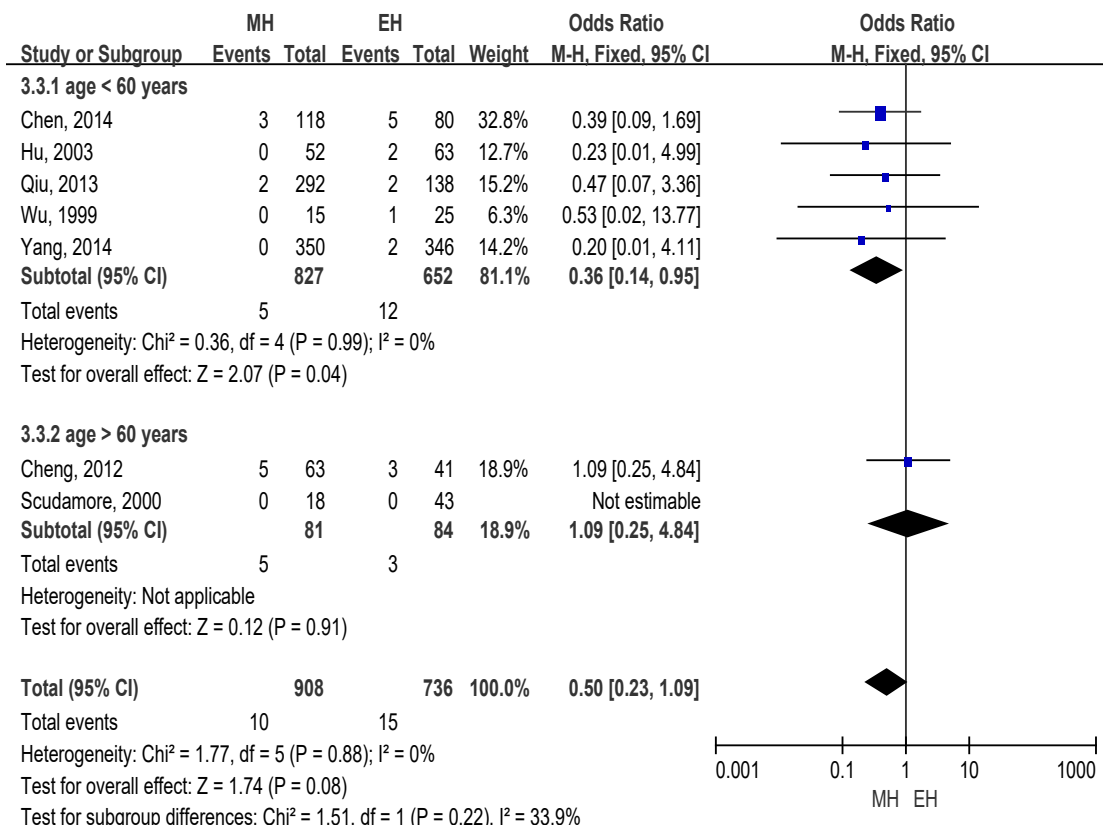

FigC2 Subgroup analysis of mortality rate by mean age of patients (the study Hu,2003 grouped to age<60years)

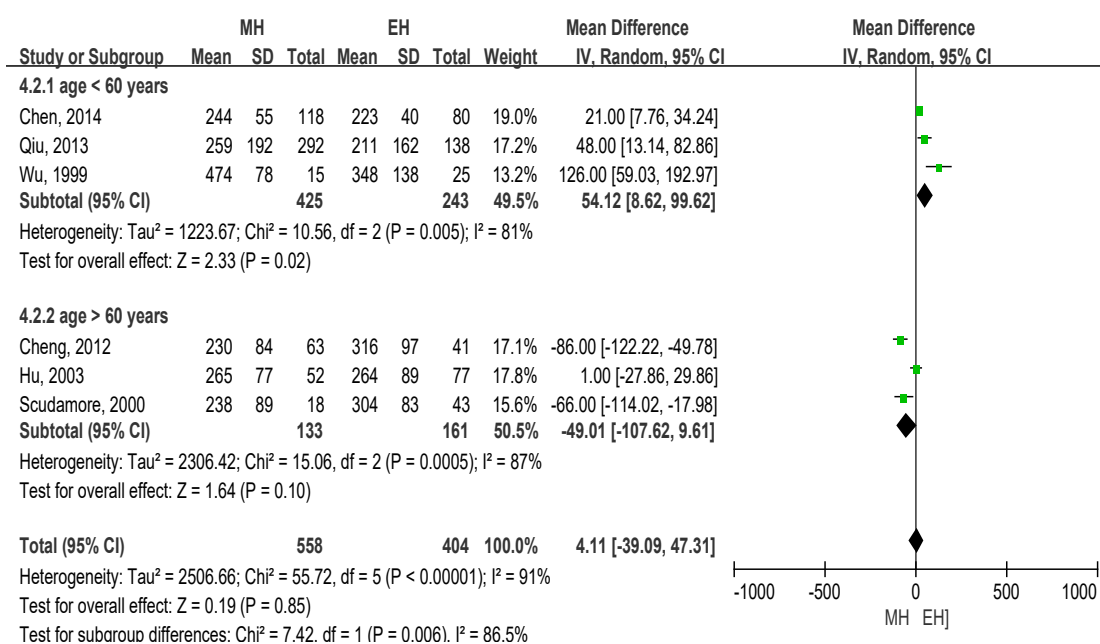

Fig D1 Subgroup analysis of operation time by mean age of patients (the study Hu,2003 grouped to age>60years)

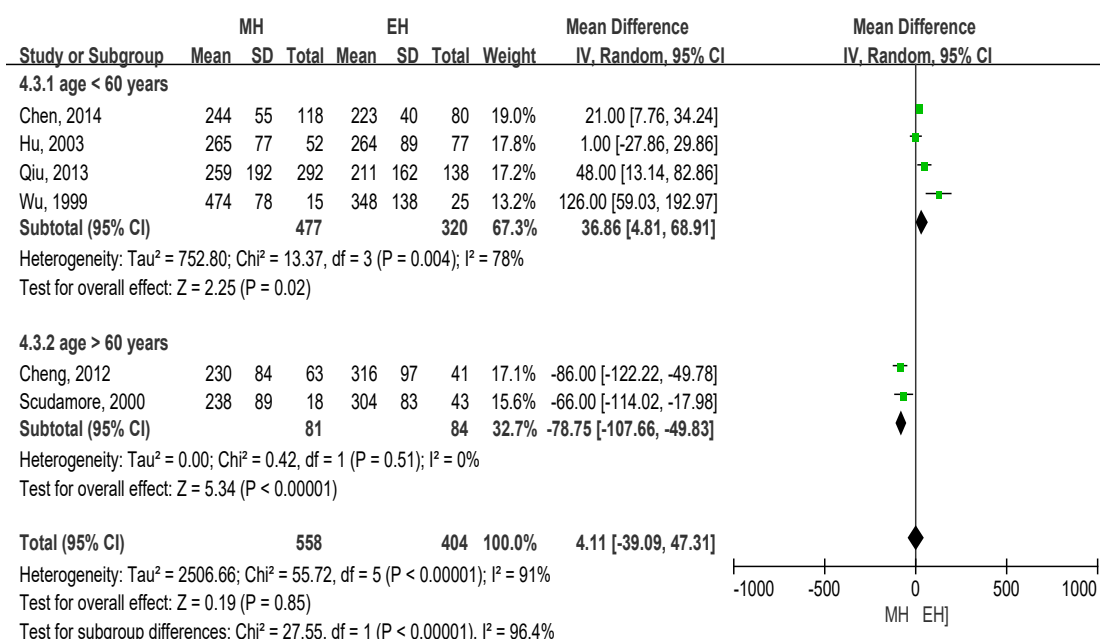

Fig D2 Subgroup analysis of operation time by mean age of patients (the study Hu,2003 grouped to age<60years)



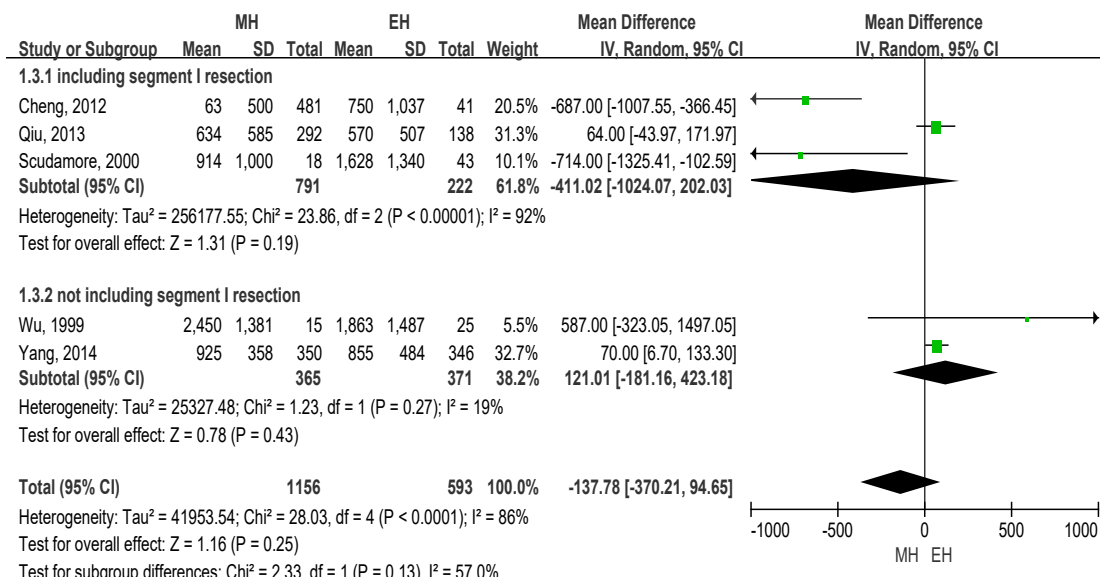

Fig E Subgroup analysis of blood loss by type of MH

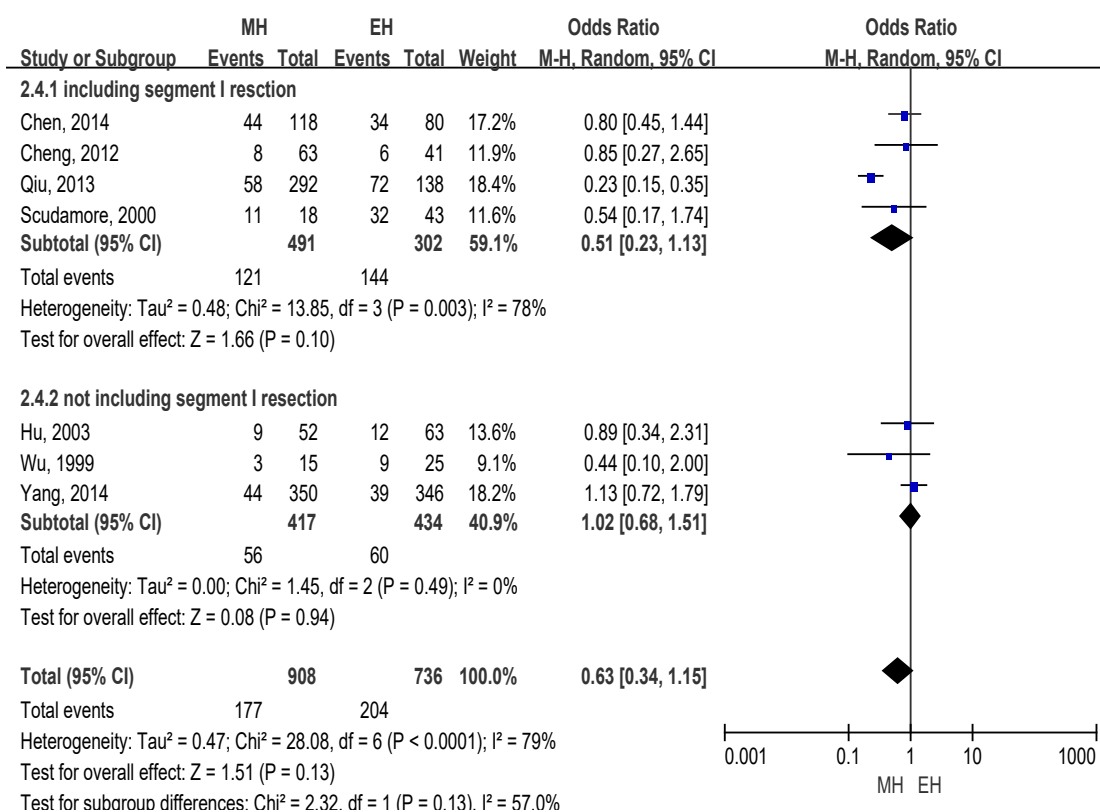

Fig F Subgroup analysis of morbidity rate by type of MH

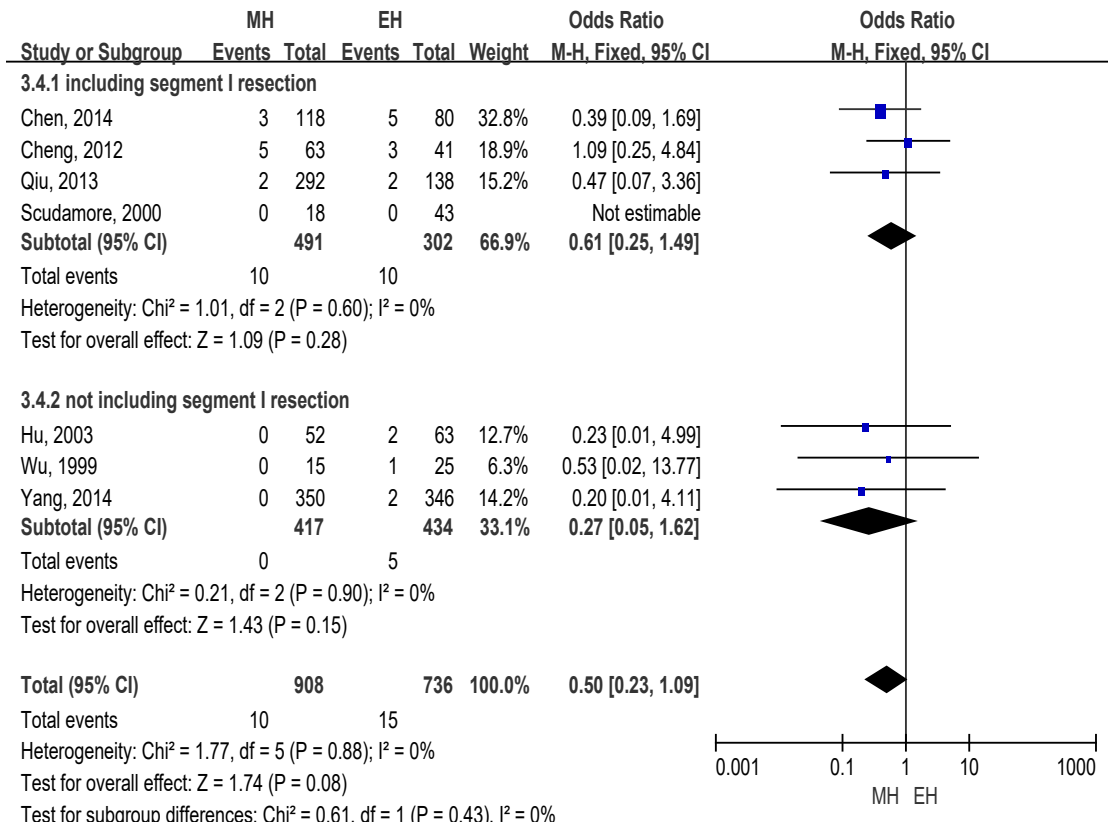

Fig G Subgroup analysis of mortality rate by type of MH

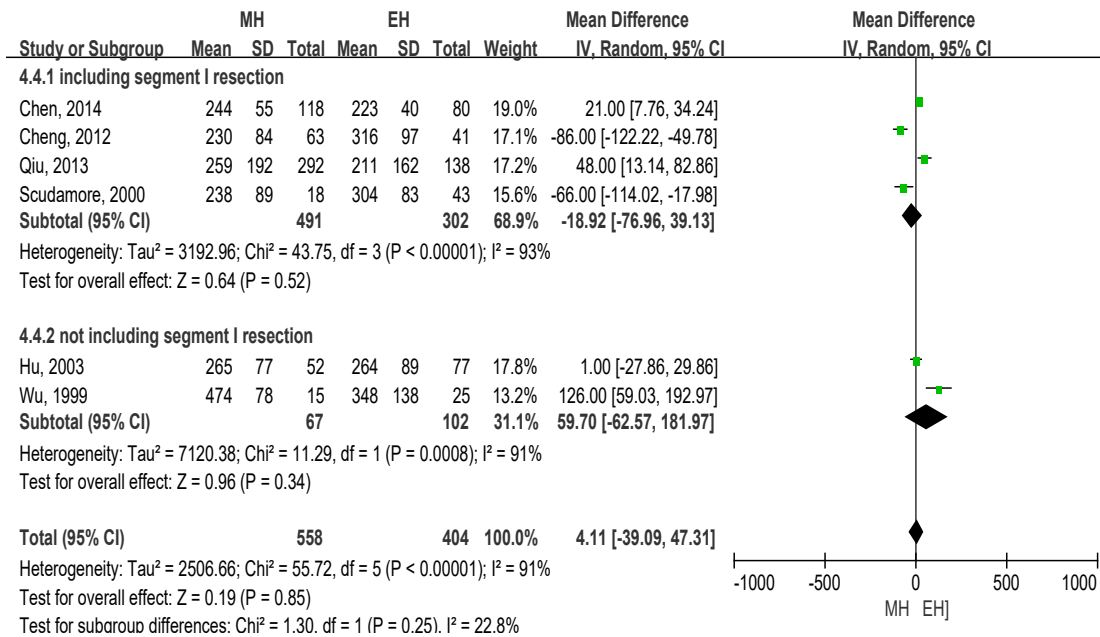

Fig H Subgroup analysis of operation time by type of MH

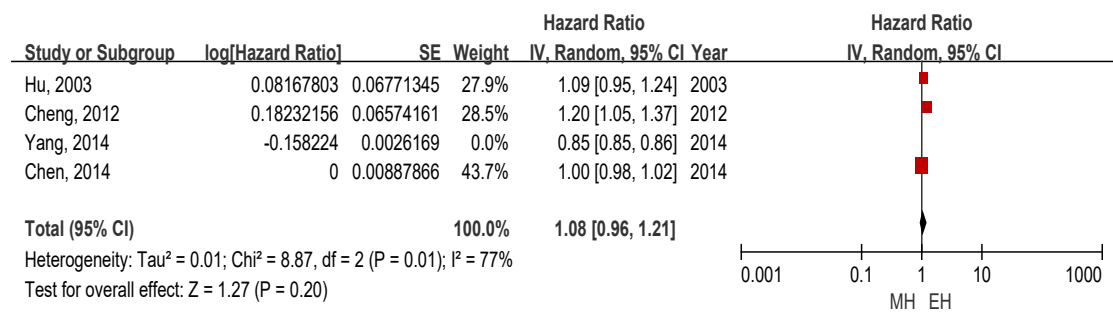

Fig I Sensitivity analysis of overall survival via removing the study manifested by high heterogeneity
